# Supplementary material for: Regeneration of the digestive tract of an anterior-eviscerating sea cucumber, Eupentacta quinquesemita, and the involvement of mesenchymal–epithelial transition in digestive tube formation
Source: PubMed Central journal article supplement (PMC6588844; doi:10.1186/s40851-019-0133-3), 2019-06-21

Okada and Kondo Supplementary Figure 2

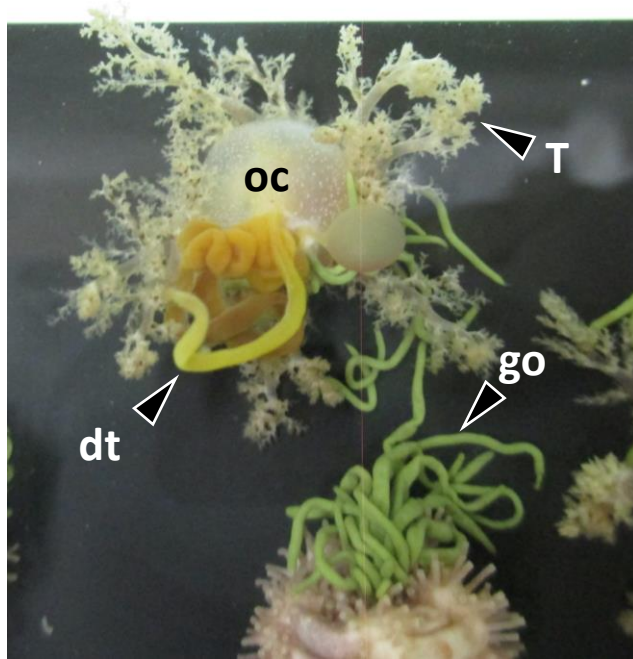

Supplement: 40851_2019_133_MOESM2_ESM.pdf [file 40851_2019_133_MOESM2_ESM.pdf]
